# Supplementary material
Source: MDPI journal article supplement (https://www.mdpi.com/2220-9964/13/3/92)
Supplement: s1 [file s1]

## Supplement

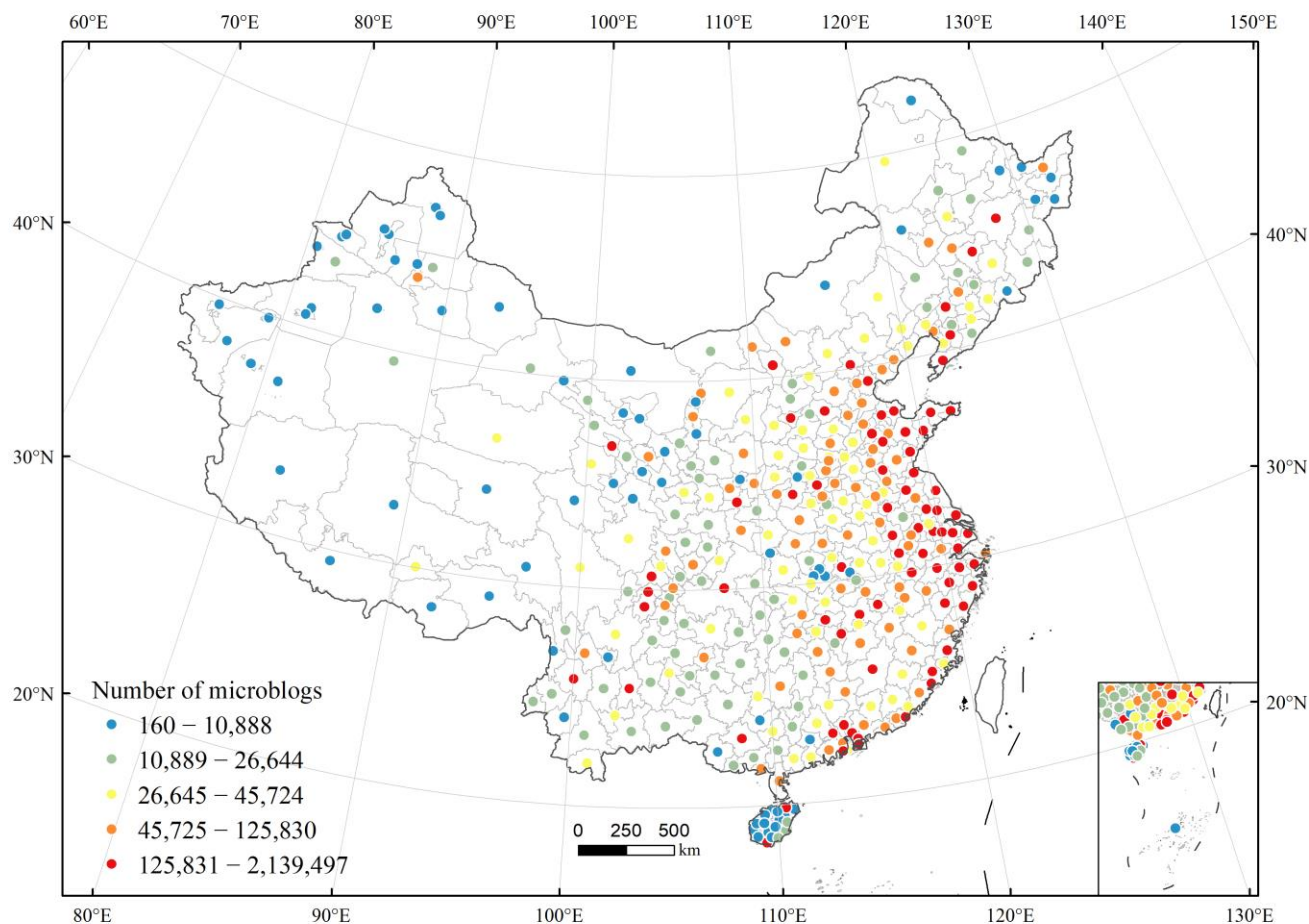

**Figure S1.** The distribution of the number of microblogs through preprocessing and filtering.

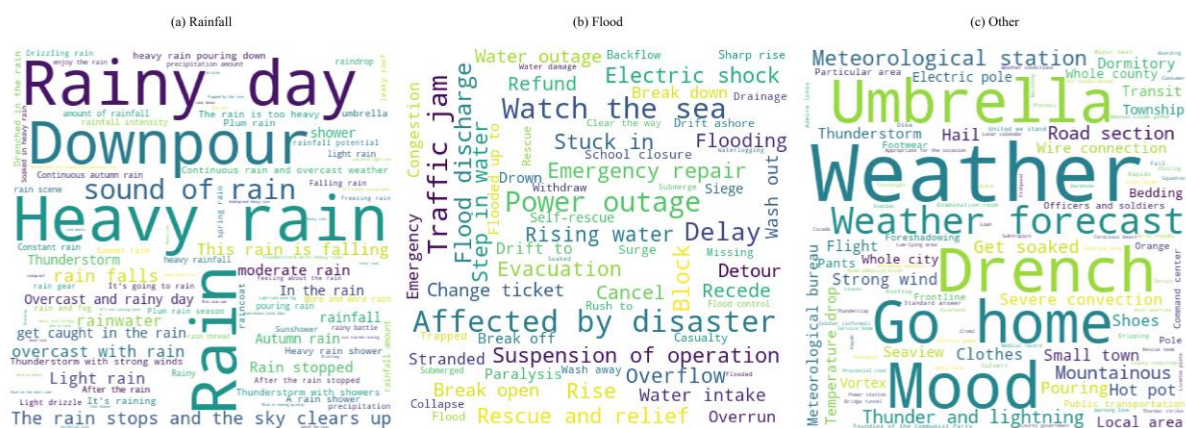

**Figure S2.** Keywords of dominated categories of part-of-speech across keyword types.
